# Supplementary material for: Intrathecal IgG Synthesis and Persistent Inflammation Are Associated with White Matter Lesions in HIV-negative Patients with Cryptococcal Meningoencephalitis
Source: PubMed Central journal article supplement — Intern Med. 2019 Jun 27;58(21):3077–82. doi: 10.2169/internalmedicine.2338-18 (PMC6875458; doi:10.2169/internalmedicine.2338-18), 2019-06-27
Supplement: 1349-7235-58-3077-s001.pdf [file 1349-7235-58-3077-s001.pdf]

**Table S1. Clinical characteristics of 11 human immunodeficiency virus-negative patients with cryptococcal meningitis (CM) presenting with or without white matter lesions (WMLs).**

| Patient ID | Age, sex | Clinical manifestations at presentation | Underlying conditions at presentation | WMLs at presentation | CSF IgG index | Qalb | OCB | Total CSF cell count (cells/ $\mu$ L) | Treatment regimen (primary therapy /maintenance therapy) | Time from symptom onset to hospital admission (days) | Time from symptom onset to initial MRI (days) | WML change on MRI or WML on follow-up MRI | mRS score at discharge | Discharge disposition |
|------------|----------|-----------------------------------------|---------------------------------------|----------------------|---------------|------|-----|---------------------------------------|----------------------------------------------------------|------------------------------------------------------|-----------------------------------------------|-------------------------------------------|------------------------|-----------------------|
| 1          | 80, F    | Diplopia, altered consciousness         | Rheumatoid arthritis*                 | +                    | 2.55          | 279  | N/A | 107                                   | L-AMB, 5FC /VRCZ                                         | 21                                                   | 17                                            | Worsened                                  | 6                      | Death                 |
| 2          | 33, M    | Fever, headache, altered consciousness  | –                                     | +                    | 1.16          | 46   | +   | 140                                   | L-AMB, 5FC /FCZ                                          | 31                                                   | 32                                            | Improved                                  | 0                      | Home                  |
| 3          | 79, M    | Altered consciousness                   | Diabetes mellitus, hypertension       | +                    | 1.19          | 181  | N/A | 40                                    | AMPH-B, 5FC /VRCZ                                        | 30                                                   | 30                                            | Unchanged                                 | 4                      | Home                  |
| 4          | 89, F    | Fever                                   | –                                     | +                    | 1.27          | 66   | N/A | 460                                   | L-AMB, 5FC /FCZ                                          | 22                                                   | 53                                            | Partially improved                        | 5                      | Nursing home          |
| 5          | 63, M    | Fever, headache                         | Autoimmune uveitis*, brain contusion  | +                    | 1.04          | 275  | N/A | 219                                   | L-AMB, 5FC /FCZ                                          | 31                                                   | 31                                            | Improved                                  | 1                      | Home                  |

|    |       |                                             |                                                                               |   |      |     |     |       |                  |    |    |          |   |              |
|----|-------|---------------------------------------------|-------------------------------------------------------------------------------|---|------|-----|-----|-------|------------------|----|----|----------|---|--------------|
| 6  | 81, M | Fever, headache, altered consciousness      | Nasopharyngeal cancer                                                         | + | 0.84 | 367 | N/A | 82    | AMPH-B, 5FC /FCZ | 27 | 47 | Worsened | 5 | Nursing home |
| 7  | 29, M | Fever, headache                             | –                                                                             | – | 0.78 | 231 | N/A | 287   | AMPH-B /FCZ      | 7  | 7  | –        | 0 | Home         |
| 8  | 62, M | Fever, headache, altered consciousness      | Interstitial lung disease*                                                    | – | 0.69 | 150 | –   | 35    | L-AMB, 5FC       | 1  | 1  | N/A      | 0 | Home         |
| 9  | 75, M | Headache, convulsion, altered consciousness | Hypertension, colorectal cancer                                               | – | 1.04 | 286 | N/A | 726   | L-AMB            | 6  | 7  | N/A      | 6 | Death        |
| 10 | 75, M | Headache, altered consciousness             | Diabetes mellitus, interstitial lung disease*                                 | – | 0.55 | 300 | N/A | 96    | AMPH-B, 5FC /FCZ | 12 | 12 | –        | 1 | Home         |
| 11 | 82, M | Fever, altered consciousness                | Diabetes mellitus, hypertension, interstitial lung disease, colorectal cancer | – | 0.43 | 35  | N/A | 1,450 | L-AMB, 5FC /FCZ  | 5  | 5  | –        | 0 | Home         |

Abbreviations: 5FC, flucytosine; AMPH-B, amphotericin B; CSF, cerebrospinal fluid; F, female; FCZ, fluconazole; L-AMB, liposomal

amphotericin B; M, male; MRI, magnetic resonance imaging; mRS, modified Rankin Scale; N/A, not available; OCB, oligoclonal band;

VRCZ, voriconazole. \*Underlying condition treated with glucocorticoids or immunosuppressant.
